# Supplementary material for: The Impact of Prenatal Alcohol Exposure on the Autonomic Nervous System and Cardiovascular System in Rats in a Sex-Specific Manner
Source: MDPI journal article supplement (doi:10.3390/pediatric16020024), 2024-04-09
Supplement: s1 [file s1]

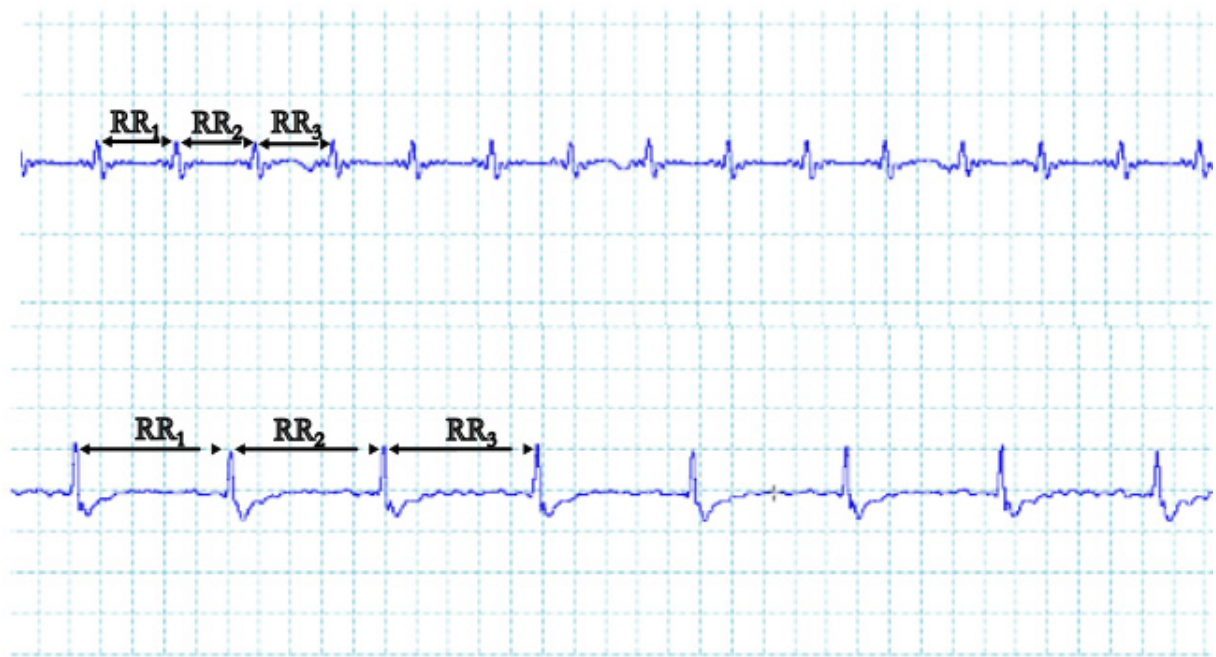

**Figure S1.** Examples of raw electrocardiographic data. Subsequent RR intervals are indicated.

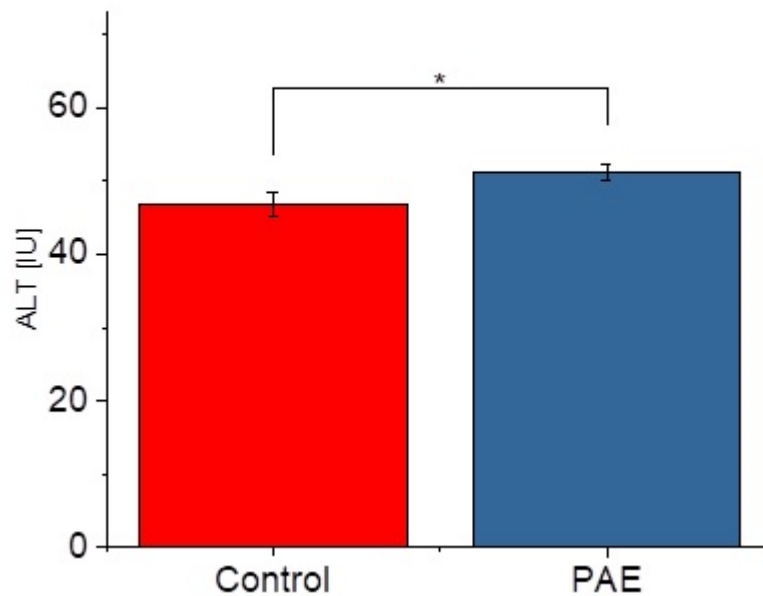

**Figure S2.** ALT, concerning group. Data are expressed as mean  $\pm$  standard error (SE). Groups: control rats received glucose p.o. during pregnancy; PAE rats received ethanol p.o. during pregnancy. \* demonstrates a statistically significant difference ( $p < 0.05$ )

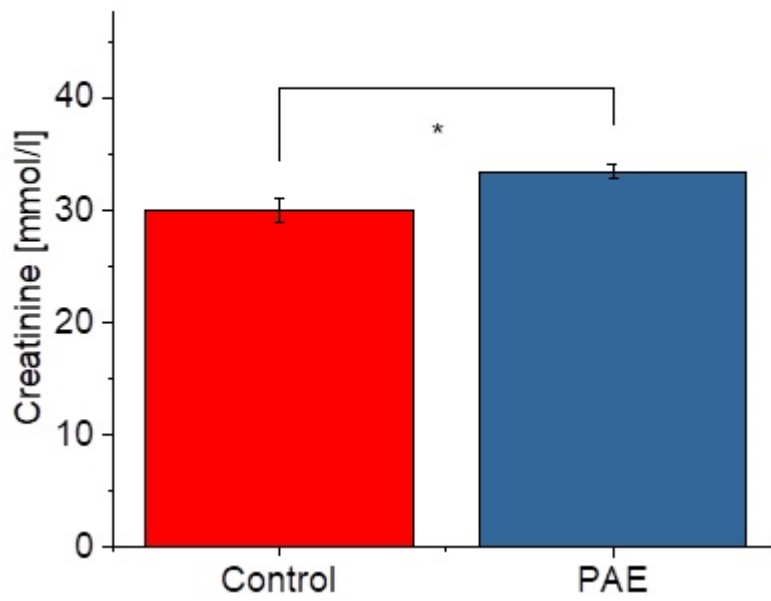

**Figure S3.** Creatinine, concerning group. Data are expressed as mean  $\pm$  standard error (SE). Groups: control rats received glucose p.o. during pregnancy; PAE rats received ethanol p.o. during pregnancy. \* demonstrates a statistically significant difference ( $p<0.05$ )

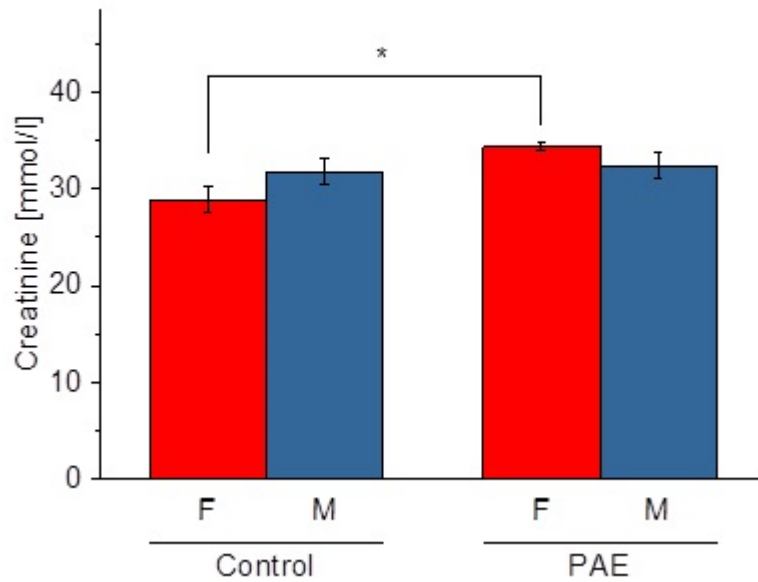

**Figure S4** Creatinine, concerning group and sex. Data are expressed as mean  $\pm$  standard error (SE). Groups: control rats received glucose p.o. during pregnancy; PAE rats received ethanol p.o. during pregnancy; sex: F- female, M- male. \* demonstrates statistically significant differences ( $p<0.05$ )

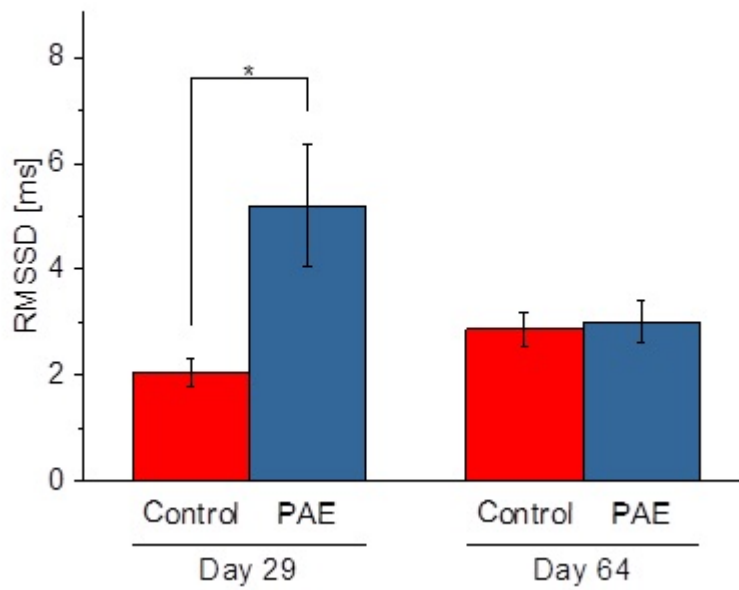

**Figure S5.** RMSSD, concerning day and group. Data are expressed as mean  $\pm$  standard error (SE). Groups: control rats received glucose p.o. during pregnancy; PAE rats received ethanol p.o. during pregnancy. \* demonstrates statistically significant differences ( $p < 0.05$ )

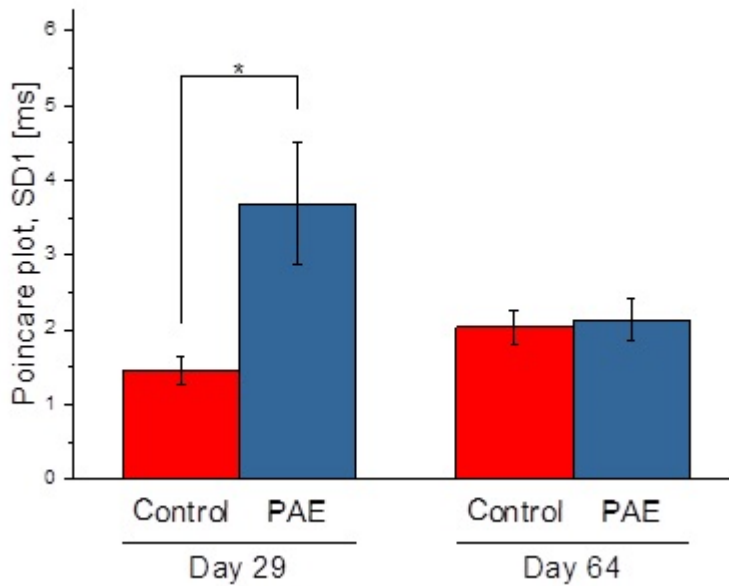

**Figure S6.** SD1, concerning day and group. Data are expressed as mean  $\pm$  standard error (SE). Groups: control rats received glucose p.o. during pregnancy; PAE rats received ethanol p.o. during pregnancy. \* demonstrates statistically significant differences ( $p < 0.05$ )

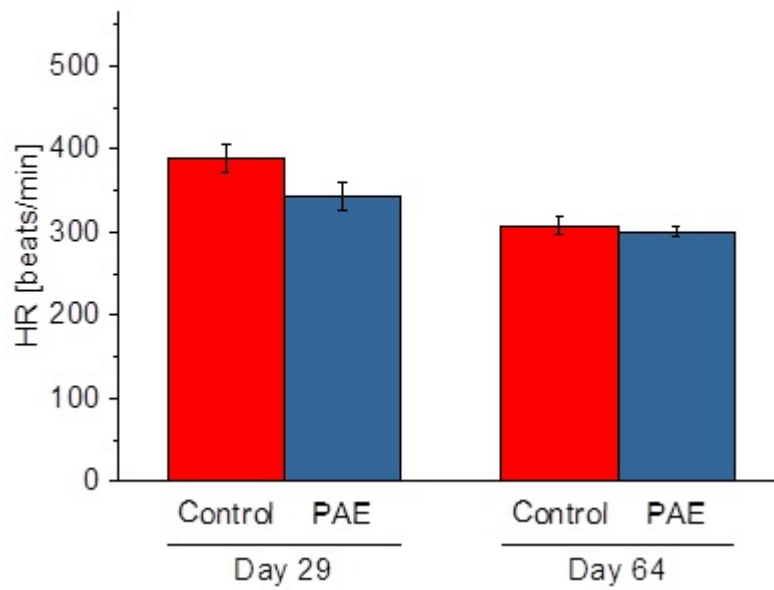

**Figure S7.** Heart rate, concerning day and group. Data are expressed as mean  $\pm$  standard error (SE). Groups: control rats received glucose p.o. during pregnancy; PAE rats received ethanol p.o. during pregnancy. \* demonstrates statistically significant differences ( $p < 0.05$ )

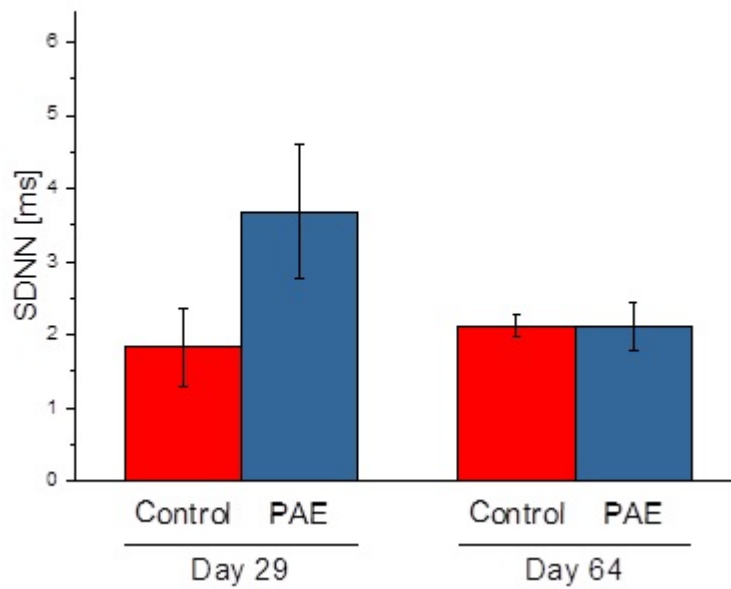

**Figure S8.** SDNN, concerning day and group. Data are expressed as mean  $\pm$  standard error (SE). Groups: control rats received glucose p.o. during pregnancy; PAE rats received ethanol p.o. during pregnancy. \* demonstrates statistically significant differences ( $p < 0.05$ )

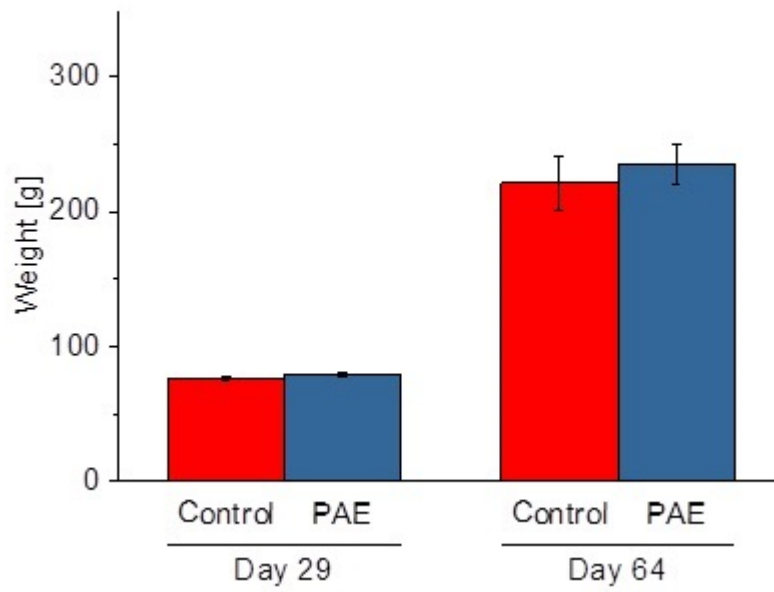

**Figure S9.** Weight, concerning day and group. Data are expressed as mean  $\pm$  standard error (SE). Groups: control rats received glucose p.o. during pregnancy; PAE rats received ethanol p.o. during pregnancy. \* demonstrates statistically significant differences ( $p < 0.05$ )
